# Supplementary material for: Enantioselective synthesis of pure (R,R)-2,3-butanediol in Escherichia coli with stereospecific secondary alcohol dehydrogenases
Source: Royal Society of Chemistry journal article supplement (doi:10.1039/b913501d), 2009-01-01

## Supplementary Information

### Sequences

#### *B. subtilis alsS* cDNA

atgttgacaaaagcaacaaaagaacaaaaatcccttgtgaaaaacagagggcgagcttgttggattgcttagtgagcaaggtgtcac  
acatgtatttggcattccaggtgcaaaaattgatgcggtatttgacgctttacaagataaaggacctgaaattatcgttcccggcagcaacaaa  
acgcagcattcatggcccaagcagtcggccggttaactggaaaaccgggagtcgtttagtcacatcaggaccgggtgaccttaacttggca  
acaggcctgctgacagcgaacactgaaggagaccctgctgtgctgctggaacgtgatccgtgcagatcgtttaaaccggacacatca  
atcttggataatgcggcgctattccagccgattacaaaatacagtgtagaagttcaagatgtaaaaaatataccggaagctgttacaatgcat  
ttaggatagcgtcagcagggcaggtcggggccgcttttggagctttccgcaagatgttgaatgaagtcacaatacgaacacgtgcgt  
gctgttgacgcccacaaactcggctcgcagcagatgatcaatcagtcggccatagcaaaaatccaaacagcaaaacttctgctgtttg  
gtcggcatgaaagggcgaagaccggaagcaatfaaacgggttcgcaagctttgaaaaagggttcagcttcatttggaaacatatcaagct  
gcccgtacccttctagagatttagagatcaatatttggccgtatcggtttccgcaaccagcctggcgatttactgctagcagggcaga  
tgttctgacgatcggctatgacccgattgaatatgatccgaaattcggaaatcaatggagaccggacaattatccatttagacgagattat  
cgctgacattgatcattaccagcctgatctgaattgatcggtagacattccgtccacgatcaatcatatcgaacacgatgctgtgaaagtgg  
aatttgacagcgtgagcagaaaactcttctgatttaaaacaatatatgatgaaggtgagcaggtgcctgcagattggaatcagacagag  
cgcaccctctgaaatcgtaaagagttgctgaatgcagtcgatgatcattacagtaacttgcgatcggctgcacgccatttggatgtcac  
gttattccgcagctacgagccgtaacattaatgatcagtaacgggtatgcaaacactcggcgttgcgcttccttggcaatcggcgcttcattg  
gtgaaaccgggagaaaaagtggttctgtctctggtgacggcggttcttattctcagcaatggaattagagacagcagttcgaactaaagac  
caattgtacacattgtatggaacgacagcacatatgatcgttgcattccagcaattgaaaaataataaccgtacatctcggctcattcggg  
aataatcgatatcgtgaaatcgcggaaagcttcggagcaactggcttgcgctgagaatcaccagaccagctggcagatgttctcgtcgaagg  
catgaacgctgaaggtcctgcatcatcagatgccccggtgactacagtgataacatfaatttagcaagtgacaagcttccgaaagaattcggg  
gaactcatgaaaacgaaagctctctag

#### *B. subtilis alsD* cDNA

atgaaacgagaagcaacattcaagtgctcagccgtggtcaaaaagatcagcctgtgagccagattatcaagatcaacaatgacttctctat  
tagacggagtatatgacggagatttgaactgtcagagattccgaaatattggagactcggatcggaaaccttaacaagctgacggagagct  
gattgggtttagcggcaatttaccgtcttctcagacggaaccgcgacaccggcctcaaaatggagaccgttaccgttctgttcatttaccg  
tctttaccggacatgacgcacaaaatgatgcgaaaatgacacgcgaagactttgaaaagagatcaacagcatgctgccaagcagaaaa  
cttattttatgcaattcgcattgacggatgtttaaagggtgcagacaagaacagtagaacttcaagaaaaaccttacgtccaatgttgaag  
cggcctcaaacacagccgatttcaactcgcacaactgagaggaacgattgtaggttcttgacaccagcttatgcaaacggaatcggcttcc  
tggtatcacctgcacttcaattgacgaaggacgaattcagggcagacggttttactatgtgctgaggtgacgggtacgatttctcaaaa  
aatgaacatgaatctcagactccgaacacagcggatttcttaatgcgaatctggataaccctgattttcgaaaagatatgaaacaactgaag  
gaagccctgaataa

#### *B. subtilis bdhA* cDNA

atgaaggcagcaagatggcataaccaaaggatatccgtattgaacatcgaagagccaaaacggagccgggaaaagtaaatgatacaaa  
gtcaaatggtcggcatctcgggaagtatttacacgaatatctggcggcccgatcttattccggtgacaaaaccgaccattaacaaatg  
aaacggcacctgtcacaatggggcatgaattctccggtgaagttgctgaagtcggagaagggcgtgaaaattataaagttggagaccgctt  
gtagtcgagccgattttgtacacacggccaccaaggcgcctacaacctgatgaacaaatgggattcctcggcttagccggcggagggc  
gctgttctctgaatcgtctctgtgagatgaagagctttgtcaaacctcctgatgaattatcatatgaacaagggcgcctcgtgaaacttctgc  
agttgctctatagctgtccgctcaagcaaaccaagcagggcagacaagcggctgtattcggctcggcccgatcggacttctgtcattga  
agcgtgaaagctgcccgtgcaactgatattacgctgtgagcttctcctgaacgccagcaaaaagctgaggagcttggcgcgatcatcgt  
tgatccgtctaaaacagacgatgtagtcgctgagattgcagaacgtacagggcgggttgacgtagcattcgaagctactggtgtccaggt  
ggtgttacgacaagccatccagtcactacaattgccgggtgaaccgtcatcgtcagcatttgggaaaagggtgctgaaatccatccgaacg  
atcctgtaatacaagaacgtacagtaaaaagaattatcggataaccgcgacatcttccggctgtattgtcattaatgaaagaaggctatttca  
ccgacaacctgtaacgaaaaaatcgtactagatgattgatcaggaaggctcggggcttattaaagaaaagccaagtcacaaat  
cctgttagacctaactaa

*K. pneumoniae* MGH78578 *budC* cDNA

atgaaaaagtcgcactgttaccggcgccggccaggggattggtaaagctatgcccttcgtctgggaaggatggattgcccgtggccatt  
gccgattataacgacaccaccgcaaaagcggcgcctccgaaatcaaccaggccggcgcccgccatggcgggaaagtggatgctc  
cgaccgcgatcaggtgtttgcccgctgaacaggcgcgcaaaacgctggcggttcgacgcatcgtcaacaacgccggcgtggcgc  
cgtccacgccgatcagtcattaccccggagattgtcgataaagctacaacatcaacgtfaaaggggtgatctgggcatcaggcggc  
gtcaggcccttaagaaagagggtcacggcggaatcatcaacgctgtccaggccggccacgtcggcaaccggagctggcggt  
atatagctcagtaaatcgcgctacggcgttaaccagaccggcgtcgcgacctcgcggcgtggcgtacacagtcaacggctactgc  
ccgggattgtcaaacgcaatgtggcggaaattgaccgccaggtgtccgaagccgggtaaacgctgggttacggtaccgcca  
gttcgcaaacgcatcacctcggcggcctgtccgagccggaagatgtccgctcgtctcctatcttgcagcccggattctgattat  
gaccggcagtcattgctgatcagcgggatggtttaaactaa

*C. beijerinckii* *adh* cDNA

atgaaaggggttgccatgttaggtatcaataaactgggctggattgaaaagagcggccgggtggcggttcatacagatgcaattgtctccg  
ctggccgtcagtcctgcaccagcgacatccatacagctctcgaaggtgactgggtgatcggaaaaacatgattctggccatgaagccgt  
aggcgaagtagtggaagtgggcagcaggtaaaggattcaaacggcgatcgcgtaattgtcctgcacgaccccagattggcgctca  
ctggaagttcaggctggtttcagcagcatagtaacgggtatgttagcaggctggaagtttagcaatttaagacgggggtgtcggggagattt  
tcatgtcaacgatcggacatgaatctggctattttacctaagatgtccgctggagaacgcagtgatgattaccgacatgatcagcaggg  
ctttcaggtgccgaactggctgacatccaaatgggtccagtggtggttatcgggtattggtgctggcgtggtgatgggtatcggggcgc  
gaaattacggggcgtggtcgcacatcgggtcggcagccgtccaatttgcgtgaagcagctaaattctatgggtccacggacattctgaa  
ctataaaaatggtcacatcgtcgtatcaggtgatgaaactgacaaatggcgaaggtgtgaccgctgatcggcgggcgggcgtcagag  
actttatcgaagcgggtgtctatggttaaacctggggcgtcatttcaatataactatcggctccggcgacgcattactgatcccgcgtgtg  
aatggggctgtgggtggtgcccacaaaccattaaaggggggttatgtccgggtgctcctgctgcccgaatgctgctgacatggtggt  
ttacaaccgtgtgatctgtccaaactggttaactcagctataaccaggttcgatcattgaagaggcgtgctgctgatgaaggataagcca  
aaggatctgattaaggcgggtgttatcctgtaa

*T. brockii* *adh* cDNA

atgaaaggtttgcaatgctgtccatcgggaaagtcggctggattgaaaagagaaacctgcgccaggtccattcagatgcaatggtcggccg  
ctggcgggtgcgcttcacttcagatataccatccgtgtttgaaagcgcgtatcggcgagcgtcacaacatgattctggccacgaagccgtg  
ggcgaagtagtagaagtcggctctgaagtgaaggatttaagcctgtgatcgggtgtggtgccggcaattacggcgattggcgacctc  
tgagggtcaacgtggctatcatcagcatagcgggtgtatgctggctggcgtggaatftagcaacgtcaaggatggtgttttggcgagtttttc  
atgtcaatgacgcggacatgaatctggcacacctgccgaaagaaatccgtagaagcggccgttatgattcctgacatgatgactacgggct  
ttcatggcgggaattagcggacattgaactggcgtcaggttccggttctgggtatcgggtcggctgatggctgtagccggtgcc  
aagctgctggtgctgggtcgcacatcattcggttaggttcccgccagtttgtgtgatcgcggaatactatggtgctaccgacatcgtaaact  
ataaagacgggtccgattgaaagtcagattatgaacctgacagaaggcaaggcgttgatcgcgcaatcattcggcgggcaatgcagacat  
catggctacagccgtaaagatcgtcaaacaggcgggaccatcgcaaacgtcaattactcggggaggggtaagtgctgcccgtgcccgcg  
tctggaatgggggtgtggtatggcgcaagaccatcaaggggtctgtgccggggggcgtctgcgcatggagcgcctgattgatct  
ggtcttataaacgcgtgatccgagtaaatagttaccatgtgtccgggttcgataatattgaaagcttcatgtaataagataaaa  
ccgaaagatttaataaacagtggtgatttagcatag

Construct

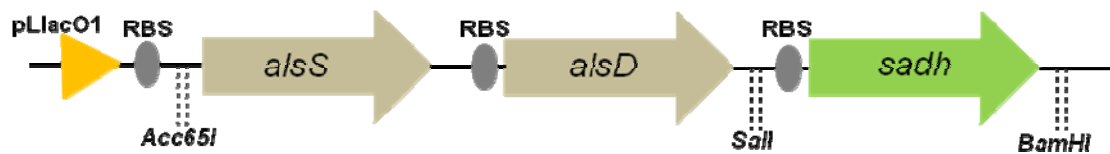

Supplement: b913501d.pdf [file b913501d.pdf]
